# Supplementary material for: GC-MS-employed phytochemical characterization, synergistic antioxidant, and cytotoxic potential of Triphala methanol extract at non-equivalent ratios of its constituents
Source: PubMed Central journal article supplement — Saudi J Biol Sci. 2022 Apr 27;29(6):103287. doi: 10.1016/j.sjbs.2022.103287 (PMC9112002; doi:10.1016/j.sjbs.2022.103287), 2022-04-27
Supplement: mmc1.pdf [file mmc1.pdf]

**Institute of National Analytical Research and Service (INARS)**  
**BCSIR Laboratories, Dhaka**  
**Bangladesh Council of Scientific and Industrial Research (BCSIR)**

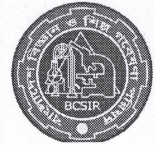

Sample Information

Analyzed by : Admin  
 Analyzed : 4/4/2021 10:51:00 AM  
 Sample Type : Unknown  
 Sample Name : A-374 (A)  
 Sample ID : A-374 (A)  
 Data File : E:\DATA\28122020\A-374 (A).qgd

Chromatogram A-374 (A) E:\DATA\28122020\A-374 (A).qgd

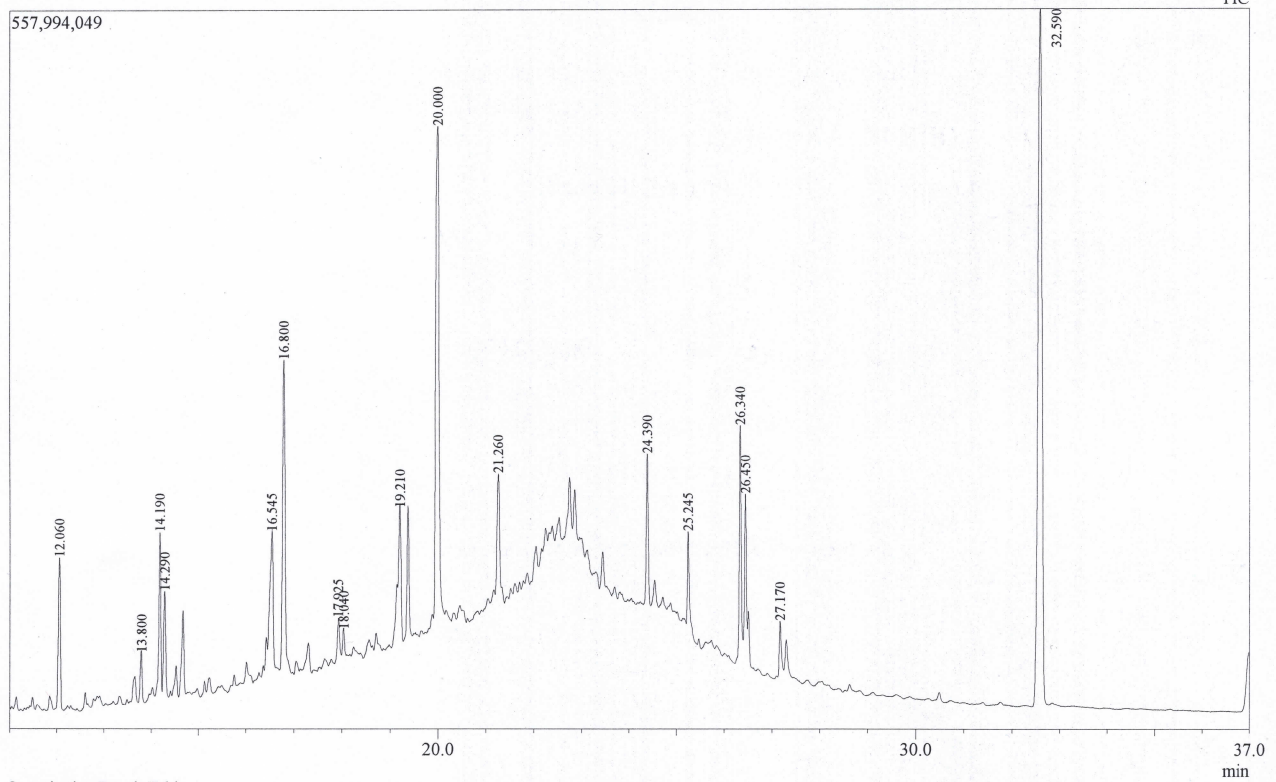

Quantitative Result Table

| ID# | Name                                                  | R. Time | m/z    | Area     | Height  | Conc.       | Conc.Un | Similarity |
|-----|-------------------------------------------------------|---------|--------|----------|---------|-------------|---------|------------|
| 1   | 2,4-Dimethylfuran                                     | 8.516   | 95.00  | 42100441 | 8365517 | 14.936 %    |         | 94         |
| 2   | 4-(2-Hydroxyethyl)-3-methyl-2-pyrazolin-5-one         | 10.398  | 111.00 | 27773063 | 8367038 | 9.853 %     |         | 93         |
| 3   | trans-2,3-Epoxyoctane                                 | 12.058  | 84.00  | 39541711 | 8255872 | 14.028 %    |         | 96         |
| 4   | 2-Furancarboxylic acid, 2-ethylhexyl ester            | 13.794  | 95.00  | 26873156 | 8204970 | 9.534 %     |         | 90         |
| 5   | Heptanoic acid, 3-hydroxy-, methyl ester              | 14.187  | 71.00  | 36400612 | 7612806 | 12.914 %    |         | 91         |
| 6   | 2-(3-(Methylguanidino)ethanol)                        | -       | 85.00  | ---      | ---     | N.D.(Ref) % |         | ---        |
| 7   | d-Glycero-d-ido-heptose                               | -       | 55.00  | ---      | ---     | N.D.(Ref) % |         | ---        |
| 8   | Paromomycin                                           | 16.803  | 109.00 | 27593590 | 8274656 | 9.790 %     |         | 94         |
| 9   | Octadecanoic acid                                     | 17.645  | 55.00  | 4779887  | 1067771 | 1.696 %     |         | 81         |
| 10  | Octadecanoic acid                                     | 17.926  | 57.00  | 9984246  | 2660374 | 3.542 %     |         | 77         |
| 11  | 9,9-Dimethoxybicyclo[3.3.1]nona-2,4-dione             | -       | 82.00  | ---      | ---     | N.D.(Ref) % |         | ---        |
| 12  | n-PROPYL NONYL ETHER                                  | -       | 69.00  | ---      | ---     | N.D.(Ref) % |         | ---        |
| 13  | Paromomycin                                           | -       | 58.00  | ---      | ---     | N.D.(Ref) % |         | ---        |
| 14  | Octadecanoic acid, 2-(2-hydroxyethoxy)ethyl ester     | 24.536  | 60.00  | 1885820  | 329949  | 0.669 %     |         | 61         |
| 15  | n-Hexadecanoic acid                                   | -       | 55.00  | ---      | ---     | N.D.(Ref) % |         | ---        |
| 16  | Z-(13,14-Epoxy)tetradec-11-en-1-ol acetate            | -       | 69.00  | ---      | ---     | N.D.(Ref) % |         | ---        |
| 17  | 6,9,12,15-Docosatetraenoic acid, methyl ester         | -       | 67.00  | ---      | ---     | N.D.(Ref) % |         | ---        |
| 18  | Cyclopentaneundecanoic acid                           | 27.170  | 55.00  | 17104964 | 4791795 | 6.068 %     |         | 92         |
| 19  | 1,3-Benzenedicarboxylic acid, bis(2-ethylhexyl ester) | 32.587  | 67.00  | 47829702 | 8251805 | 16.969 %    |         | 97         |

**Institute of National Analytical Research and Service (INARS)**  
**BCSIR Laboratories, Dhaka**  
**Bangladesh Council of Scientific and Industrial Research (BCSIR)**

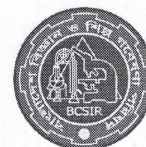

Sample Information

Analyzed by : Admin  
 Analyzed : 4/4/2021 11:41:43 AM  
 Sample Type : Unknown  
 Sample Name : A-375 (B)  
 Sample ID : A-375 (B)  
 Data File : E:\DATA\28122020\A-375 (B).qgd

Chromatogram A-375 (B) E:\DATA\28122020\A-375 (B).qgd

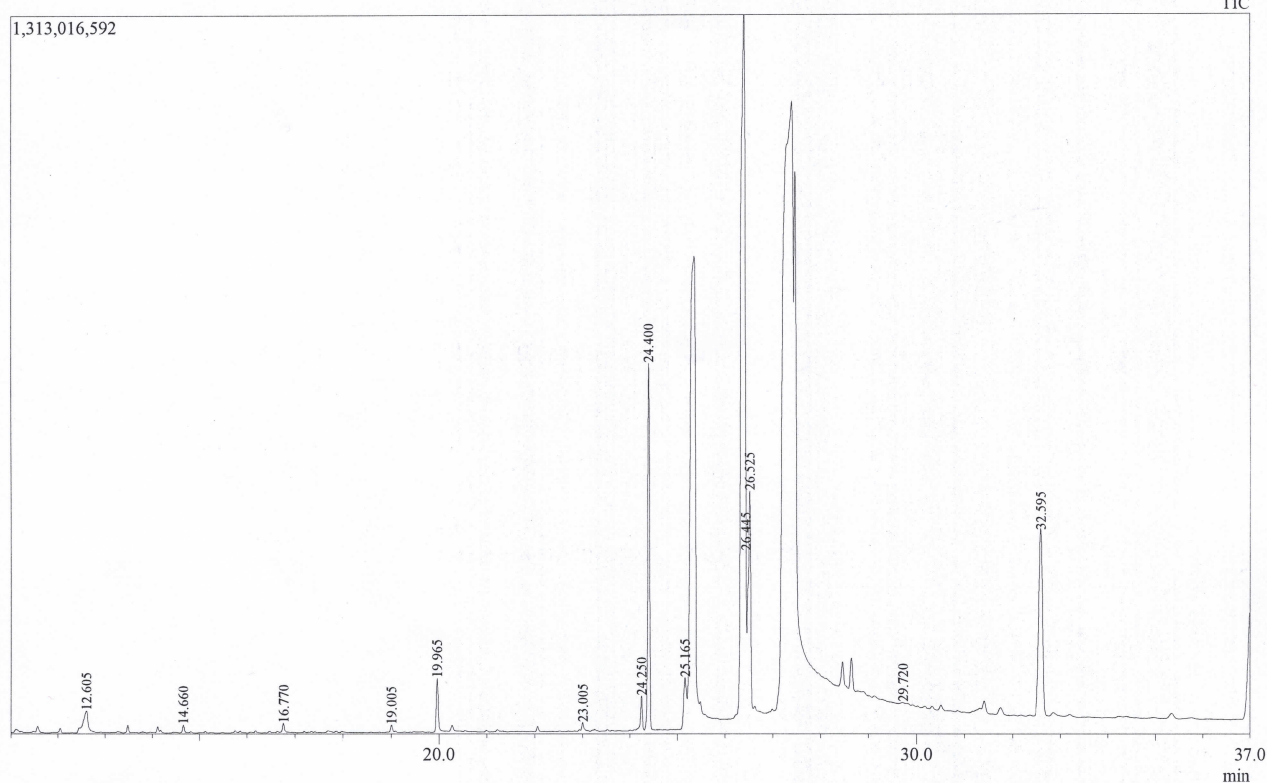

Quantitative Result Table

| ID# | Name                                           | R. Time | m/z    | Area     | Height  | Conc.       | Conc.Un | Similarity |
|-----|------------------------------------------------|---------|--------|----------|---------|-------------|---------|------------|
| 1   | 2-Cyclopenten-1-one, 5-hydroxy-2,3-dimethyl    | 19.962  | 51.00  | 32617077 | 8295690 | 7.716 %     |         | 97         |
| 2   | Spirohexane-1-carboxylic acid, ethyl ester     | 19.962  | 51.00  | 32617077 | 8295690 | 7.716 %     |         | 97         |
| 3   | 1-Cyclohexene-1-carboxylic acid                | 19.962  | 51.00  | 32617077 | 8295690 | 7.716 %     |         | 97         |
| 4   | 9-Octadecenoic acid (Z)-, methyl ester         | 24.250  | 55.00  | 22009193 | 7645464 | 5.206 %     |         | 98         |
| 5   | 7-Hexadecenoic acid, methyl ester, (Z)-        | 24.250  | 55.00  | 22009193 | 7645464 | 5.206 %     |         | 98         |
| 6   | 9-Hexadecenoic acid, methyl ester, (Z)-        | 24.250  | 55.00  | 22009193 | 7645464 | 5.206 %     |         | 98         |
| 7   | Lanosta-7,9(11)-dien-18-oic acid, 22,25-epoxy  | 26.312  | 67.00  | 80875411 | 7915536 | 19.131 %    |         | 81         |
| 8   | Pentaborane(11)                                | -       | 61.00  | ---      | ---     | N.D.(Ref) % |         | ---        |
| 9   | 4H-Pyran-4-one, 2,3-dihydro-3,5-dihydroxy-6    | 14.659  | 55.00  | 7868536  | 2970696 | 1.861 %     |         | 97         |
| 10  | Hydroxy methyl furfural                        | 16.765  | 97.00  | 8661673  | 3536218 | 2.049 %     |         | 96         |
| 11  | Hydroxy methyl furfural                        | 16.765  | 97.00  | 8661673  | 3536218 | 2.049 %     |         | 96         |
| 12  | 2-Pyrrolidinone, 5-(hydroxymethyl)-            | 19.006  | 84.00  | 22437120 | 7414633 | 5.308 %     |         | 94         |
| 13  | 2-Cyclopenten-1-one, 5-hydroxy-2,3-dimethyl    | 19.962  | 51.00  | 32617077 | 8295690 | 7.716 %     |         | 97         |
| 14  | n-Hexadecanoic acid                            | 23.002  | 60.00  | 6849035  | 2557141 | 1.620 %     |         | 95         |
| 15  | 9-Octadecenoic acid (Z)-, methyl ester         | 24.250  | 55.00  | 22009193 | 7645464 | 5.206 %     |         | 98         |
| 16  | Octadecanoic acid, 2-(2-hydroxyethoxy)ethyl e  | 24.402  | 157.00 | 17928441 | 8396404 | 4.241 %     |         | 85         |
| 17  | Oleic Acid                                     | -       | 55.00  | ---      | ---     | N.D.(Ref) % |         | ---        |
| 18  | 1,2,4-Trioxolane-2-octanoic acid, 5-octyl-, me | -       | 77.00  | ---      | ---     | N.D.(Ref) % |         | ---        |
| 19  | Cyclopentaneundecanoic acid                    | -       | 55.00  | ---      | ---     | N.D.(Ref) % |         | ---        |
| 20  | 1,3-Benzenedicarboxylic acid, bis(2-ethylhexy  | 32.598  | 76.00  | 50953031 | 8357116 | 12.053 %    |         | 97         |

**Institute of National Analytical Research and Service (INARS)**  
**BCSIR Laboratories, Dhaka**  
**Bangladesh Council of Scientific and Industrial Research (BCSIR)**

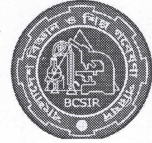

Sample Information

Analyzed by : Admin  
 Analyzed : 4/4/2021 12:32:07 PM  
 Sample Type : Unknown  
 Sample Name : A-376 (H)  
 Sample ID : A-376 (H)  
 Data File : E:\DATA\28122020\A-376 (H).qgd

Chromatogram A-376 (H) E:\DATA\28122020\A-376 (H).qgd

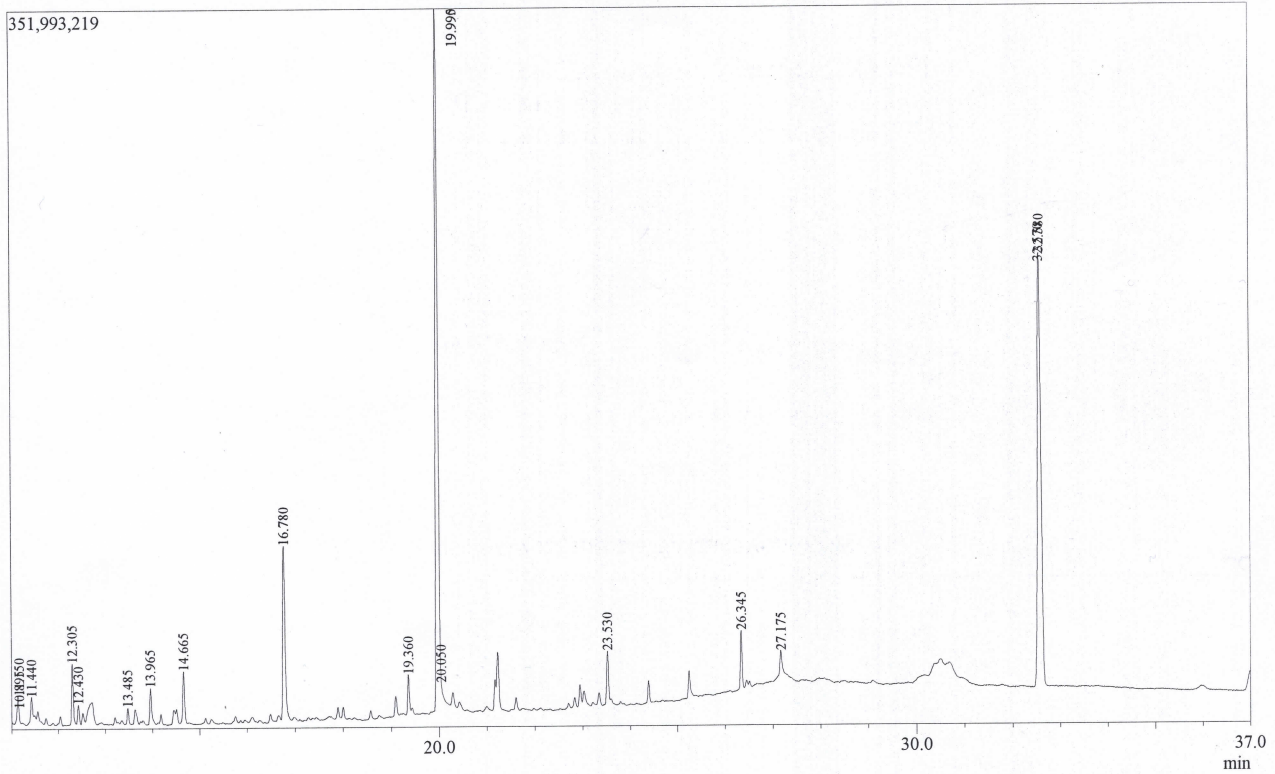

Quantitative Result Table

| ID# | Name                                             | R.Time | m/z    | Area     | Height  | Conc.       | Conc.Un | Similarity |
|-----|--------------------------------------------------|--------|--------|----------|---------|-------------|---------|------------|
| 1   | RT:6.000                                         | -      | 71.00  | ---      | ---     | N.D.(Ref) % | ---     | ---        |
| 2   | RT:20.050                                        | -      | 52.00  | ---      | ---     | N.D.(Ref) % | ---     | ---        |
| 3   | 1,2,4-Benzenetriol                               | -      | 52.00  | ---      | ---     | N.D.(Ref) % | ---     | ---        |
| 4   | 2-Cyclopenten-1-one, 5-hydroxy-2,3-dimethyl      | 16.776 | 69.00  | 32220591 | 8244314 | 6.755 %     |         | 98         |
| 5   | Paromomycin                                      | 19.992 | 57.00  | 21209765 | 8108614 | 4.446 %     |         | 99         |
| 6   | 1,3-Benzenedicarboxylic acid, bis(2-ethylhexy    | 32.588 | 167.00 | 51817366 | 8382485 | 10.863 %    |         | 96         |
| 7   | 1,3-Benzenedicarboxylic acid, bis(2-ethylhexy    | 32.588 | 167.00 | 51817366 | 8382485 | 10.863 %    |         | 96         |
| 8   | Carbonocyanidic acid, ethyl ester                | 7.770  | 54.00  | 17087391 | 6804018 | 3.582 %     |         | 96         |
| 9   | Furfural                                         | 8.518  | 95.00  | 40835307 | 8388693 | 8.561 %     |         | 98         |
| 10  | Cyclohexanone                                    | 10.408 | 55.00  | 7084690  | 2567521 | 1.485 %     |         | 96         |
| 11  | 4-Nonanol                                        | 10.891 | 55.00  | 8082150  | 3402005 | 1.694 %     |         | 96         |
| 12  | 2-Furancarboxaldehyde, 5-methyl-                 | 11.148 | 53.00  | 9810133  | 3950420 | 2.057 %     |         | 93         |
| 13  | Cyclobut-1-enylmethanol                          | 11.435 | 55.00  | 10502255 | 3775573 | 2.202 %     |         | 93         |
| 14  | Carbamic acid, phenyl ester                      | 12.303 | 94.00  | 19774147 | 7875633 | 4.146 %     |         | 97         |
| 15  | Tetrahydrocyclopenta[1,3]dioxin-4-one            | 12.431 | 68.00  | 15328408 | 5993338 | 3.214 %     |         | 93         |
| 16  | Thymine                                          | 13.483 | 55.00  | 9012657  | 3577835 | 1.889 %     |         | 94         |
| 17  | 2,3-Dimethylfumaric acid                         | 13.964 | 55.00  | 12171251 | 4830716 | 2.552 %     |         | 97         |
| 18  | 4H-Pyran-4-one, 2,3-dihydro-3,5-dihydroxy-6-     | 14.662 | 55.00  | 13752481 | 5271781 | 2.883 %     |         | 97         |
| 19  | 2-Cyclopenten-1-one, 5-hydroxy-2,3-dimethyl      | 16.776 | 69.00  | 32220591 | 8244314 | 6.755 %     |         | 98         |
| 20  | 2-Propenoic acid, 3-phenyl-                      | 19.358 | 51.00  | 6462997  | 2515742 | 1.355 %     |         | 93         |
| 21  | Paromomycin                                      | 19.993 | 97.00  | 41308023 | 8285082 | 8.660 %     |         | 98         |
| 22  | 1,2,3,5-Cyclohexanetetrol, (1.alpha.,2.beta.,3.ε | 23.527 | 60.00  | 15238417 | 4925917 | 3.195 %     |         | 94         |
| 23  | Cyclopropanepentanoic acid, 2-undecyl-, meth     | 26.345 | 55.00  | 9445985  | 3855825 | 1.980 %     |         | 93         |

| ID# | Name                                          | R.Time | m/z    | Area     | Height  | Conc.       | Conc.Un | Similarity |
|-----|-----------------------------------------------|--------|--------|----------|---------|-------------|---------|------------|
| 24  | Cyclopentaneundecanoic acid                   | -      | 55.00  | ---      | ---     | N.D.(Ref) % | ---     | ---        |
| 25  | 1,3-Benzenedicarboxylic acid, bis(2-ethylhexy | 32.588 | 167.00 | 51817366 | 8382485 | 10.863 %    |         | 97         |
